# Supplementary material for: Time for a Break: Admissions to an Urban Emergency Department after Working Out—A Retrospective Study from Switzerland
Source: Hindawi journal article supplement (doi:10.1155/2015/610137), 2015-01-01
Supplement: f1 [file 610137.f1.zip]

## SUPPLEMENT 1

| Patients (n)          | Sex | Age | Cause of accident | Region of injury                                       | Direct Trauma | Outcome    |
|-----------------------|-----|-----|-------------------|--------------------------------------------------------|---------------|------------|
| <b>Cardiovascular</b> |     |     |                   |                                                        |               |            |
| 1                     | m   | 62  | Workout           | Atrial fibrillation                                    | -             | inpatient  |
| 2                     | m   | 64  | Indoor cycling    | STEMI                                                  | -             | inpatient  |
| 3                     | m   | 38  | Workout           | Syncope with arterial hypertension                     | -             | outpatient |
| 4                     | m   | 43  | Workout           | Uncontrolled hypertension with dyspnoea and leg oedema | -             | outpatient |
| 5                     | m   | 68  | Workout           | Syncope                                                | -             | outpatient |
| 6                     | m   | 39  | Swimming          | Arrhythmia                                             | -             | inpatient  |
| 7                     | m   | 52  | Workout           | STEMI                                                  | -             | inpatient  |
| 8                     | m   | 46  | Indoor cycling    | Several pre-syncope                                    | -             | outpatient |
| 9                     | m   | 17  | Workout           | Syncope with palpitations                              | -             | outpatient |
| 10                    | m   | 69  | Swimming          | TdP-Tachycardia                                        | -             | inpatient  |
| 11                    | m   | 37  | Workout           | Art. hypertension, palpitation and syncope             | -             | outpatient |
| 12                    | m   | 40  | Workout           | Tachycardia and dyspnoea                               | -             | outpatient |
| 13                    | m   | 57  | Workout           | Syncope                                                | -             | outpatient |
| 14                    | m   | 55  | Workout           | Carotid dissection                                     | -             | inpatient  |
| 15                    | m   | 68  | Indoor cycling    | STEMI                                                  | -             | inpatient  |
| 16                    | f   | 29  | Workout           | Symptomatic varicosis                                  | -             | outpatient |
| 17                    | f   | 53  | Workout           | Narrow complex tachycardia                             | -             | outpatient |

|                     |   |    |                |                              |                       |            |
|---------------------|---|----|----------------|------------------------------|-----------------------|------------|
| 18                  | m | 28 | Workout        | Death (type A dissection)    | -                     | death      |
| 19                  | m | 32 | Workout        | Atrial tachycardia           | -                     | inpatient  |
| <b>Neurological</b> |   |    |                |                              |                       |            |
| 20                  | m | 46 | Workout        | IS                           | -                     | inpatient  |
| 21                  | m | 68 | Workout        | IS                           | -                     | inpatient  |
| 22                  | m | 79 | Indoor cycling | Subarachnoid haemorrhage     | -                     | inpatient  |
| 23                  | m | 66 | Workout        | IS                           | -                     | inpatient  |
| 24                  | f | 84 | Workout        | Cerebral haemorrhage         | -                     | inpatient  |
| 25                  | m | 39 | Workout        | Cerebral haemorrhage         | -                     | Inpatient  |
| 26                  | m | 67 | Workout        | Migraine                     | -                     | inpatient  |
| 27                  | f | 50 | Workout        | Transient global amnesia     | -                     | outpatient |
| 28                  | m | 40 | Workout        | Craniocerebral injury        | Fall from pull-up-bar | outpatient |
| 29                  | m | 59 | Workout        | Transient global amnesia     | -                     | outpatient |
| 30                  | m | 18 | Indoor cycling | Epileptic seizure            | -                     | inpatient  |
| 31                  | m | 45 | Workout        | Epileptic seizure            | -                     | outpatient |
| 32                  | m | 22 | Workout        | Migraine                     | -                     | outpatient |
| 33                  | m | 27 | Workout        | Subarachnoid haemorrhage     | -                     | inpatient  |
| 34                  | m | 47 | Indoor cycling | Subarachnoid haemorrhage     | -                     | inpatient  |
| 35                  | m | 64 | Workout        | Epileptic seizure            | -                     | inpatient  |
| 36                  | m | 22 | Workout        | Epileptic seizure            | -                     | inpatient  |
| 37                  | f | 23 | Workout        | Dizziness                    | -                     | outpatient |
| 38                  | m | 18 | Workout        | Dizziness                    | -                     | outpatient |
| 39                  | m | 35 | Workout        | Unclear neurological picture | -                     | inpatient  |
| 40                  | m | 19 | Workout        | Unclear neurological picture | -                     | inpatient  |

|                        |   |    |              |                                    |                        |            |
|------------------------|---|----|--------------|------------------------------------|------------------------|------------|
| 41                     | f | 59 | Home trainer | Transient global amnesia           | -                      | outpatient |
| 42                     | m | 19 | Workout      | Epileptic seizure                  | -                      | inpatient  |
| <b>Musculoskeletal</b> |   |    |              |                                    |                        |            |
| 43                     | m | 18 | Workout      | Chest pain                         | yes                    | outpatient |
| 44                     | m | 33 | Workout      | Metacarpal V Fx                    | yes                    | outpatient |
| 45                     | m | 39 | Workout      | Knee torsion                       | yes                    | outpatient |
| 46                     | m | 23 | Treadmill    | Musculotendinous overload ankle    | yes                    | outpatient |
| 47                     | m | 20 | Workout      | Fx Phalanx                         | yes                    | outpatient |
| 48                     | m | 34 | Workout      | Tendovaginitis                     | yes                    | outpatient |
| 49                     | f | 34 | Workout      | Tendinitis calcarea                | yes                    | outpatient |
| 50                     | f | 31 | Workout      | Ruptured muscle fibre              | yes                    | outpatient |
| 51                     | m | 41 | Workout      | Insertion tendinitis M. Deltoideus | yes                    | outpatient |
| 52                     | f | 38 | Treadmill    | Runner's knee                      | yes                    | outpatient |
| 53                     | m | 34 | Workout      | Soft tissue swelling hip           | yes                    | outpatient |
| 54                     | m | 18 | Workout      | Nasal bone Fx                      | Hit nose               | outpatient |
| 55                     | m | 20 | Work-out     | Amputation finger tip              | Barbell fell on finger | outpatient |
| 56                     | m | 24 | Workout      | Chest pain                         | yes                    | outpatient |
| 57                     | m | 27 | Workout      | Contusion trochanter major         | yes                    | outpatient |
| 58                     | f | 76 | Workout      | Hardening M. Trapezius             | yes                    | outpatient |
| 59                     | f | 76 | Workout      | Hardening M. Trapezius             | yes                    | outpatient |
| 60                     | m | 25 | Workout      | Lumbago                            | yes                    | outpatient |
| 61                     | m | 38 | Treadmill    | Lesion of lateral meniscus         |                        | outpatient |
| 62                     | m | 18 | Workout      | Contusion upper arm                | yes                    | outpatient |
| 63                     | m | 29 | Workout      | Hardening M. gluteus               | yes                    | outpatient |

|    |   |    |           |                                        |                      |            |
|----|---|----|-----------|----------------------------------------|----------------------|------------|
| 64 | m | 25 | Workout   | Distortion ankle                       | yes                  | outpatient |
| 65 | m | 17 | Workout   | Metacarpal I Fx                        | Barbell fell on hand | outpatient |
| 66 | m | 19 | Workout   | Hardening muscles neck                 | yes                  | outpatient |
| 67 | m | 33 | Workout   | Tendinitis M. supraspinatus            | yes                  | outpatient |
| 68 | m | 79 | Workout   | Pain vertebral bodies                  | yes                  | outpatient |
| 69 | m | 19 | Workout   | Headache and pain vertebral bodies     | yes                  | outpatient |
| 70 | m | 44 | Treadmill | Herniated disc                         | yes                  | outpatient |
| 71 | m | 26 | Workout   | Headache                               | yes                  | outpatient |
| 72 | m | 25 | Workout   | Muscular stiffness thorax              | yes                  | outpatient |
| 73 | m | 30 | Workout   | Subacromial impingement                | yes                  | outpatient |
| 74 | m | 34 | Workout   | Lumboischialgia                        | yes                  | outpatient |
| 75 | m | 23 | Workout   | Hardening M. trapezius                 | yes                  | outpatient |
| 76 | m | 22 | Workout   | Tendinitis M. extensor pollicis longus | yes                  | outpatient |
| 77 | m | 26 | Workout   | Paraesthesia finger tips I-V           | yes                  | outpatient |
| 78 | f | 44 | Workout   | Activated osteochondrosis              | yes                  | outpatient |
| 79 | m | 48 | Workout   | Strain trauma adductor muscles         | yes                  | outpatient |
| 80 | m | 24 | Treadmill | Overload tendinitis condylus lat. knee | yes                  | outpatient |
| 81 | f | 23 | Workout   | Lumbosacral pain syndrome              | yes                  | outpatient |
| 82 | m | 54 | Workout   | Insertion tendinitis M. serratus       | yes                  | outpatient |
| 83 | m | 45 | Workout   | Pseudoradicular syndrome               | yes                  | outpatient |
| 84 | m | 38 | Workout   | Mechanical carpal tunnel syndrome      | yes                  | outpatient |

|     |   |    |           |                                     |                      |            |
|-----|---|----|-----------|-------------------------------------|----------------------|------------|
| 85  | m | 36 | Workout   | Pain lower limb                     | yes                  | outpatient |
| 86  | f | 24 | Workout   | Lumbalgia with pseudoradicular pain | yes                  | outpatient |
| 87  | m | 84 | Treadmill | Bursitis trochanterica              | yes                  | outpatient |
| 88  | m | 34 | Treadmill | Tendovaginitis foot                 | yes                  | outpatient |
| 89  | m | 29 | Workout   | Acute lumbalgia                     | yes                  | outpatient |
| 90  | f | 27 | Workout   | Musculoskeletal pain sternum        | yes                  | outpatient |
| 91  | m | 21 | Workout   | Subluxation shoulder                | Lifting weights      | outpatient |
| 92  | m | 56 | Workout   | Luxation shoulder                   | yes                  | outpatient |
| 93  | m | 44 | Workout   | Musculoskeletal pain                | yes                  | outpatient |
| 94  | m | 18 | Workout   | Tension headache                    | yes                  | outpatient |
| 95  | m | 27 | Workout   | Lumbago                             | Lifting weights      | outpatient |
| 96  | m | 28 | Workout   | Luxation shoulder                   | Barbell slipped away | outpatient |
| 97  | m | 25 | Workout   | Exercise induced headache           | yes                  | outpatient |
| 98  | f | 37 | Workout   | Muscular neck pain                  | yes                  | outpatient |
| 99  | f | 25 | Workout   | Muscular neck pain                  | yes                  | outpatient |
| 100 | f | 42 | Workout   | Muscular chest pain                 |                      | outpatient |
| 101 | m | 18 | Workout   | Rupture of muscle fibre quadriceps  | yes                  | outpatient |
| 102 | m | 55 | Workout   | Swollen ankle (overuse)             | yes                  | outpatient |
| 103 | m | 42 | Workout   | Musculoskeletal chest pain          | yes                  | outpatient |
| 104 | m | 35 | Workout   | Pain coccyx (overload)              | yes                  | outpatient |
| 105 | m | 17 | Workout   | Overuse biceps tendon               | yes                  | outpatient |
| 106 | m | 37 | Workout   | Tendinitis M. quadriceps            | yes                  | outpatient |

|                                               |   |    |           |                                             |                       |            |
|-----------------------------------------------|---|----|-----------|---------------------------------------------|-----------------------|------------|
| 107                                           | m | 63 | Workout   | Musculoskeletal chest pain                  | yes                   | outpatient |
| 108                                           | m | 27 | Workout   | Cervical pain syndrome                      | yes                   | outpatient |
| 109                                           | m | 33 | Workout   | Finger tip Fx                               | yes                   | outpatient |
| 110                                           | m | 18 | Workout   | Inguinal hernia                             | yes                   | outpatient |
| 111                                           | m | 46 | Workout   | Musculoskeletal chest pain                  | yes                   | outpatient |
| 112                                           | m | 27 | Workout   | Musculoskeletal pain M. pectoralis & M. SCM | yes                   | outpatient |
| 113                                           | m | 24 | Workout   | Musculoskeletal pain hip and shoulder       | yes                   | outpatient |
| 114                                           | m | 31 | Treadmill | Tendinitis Achilles tendon                  | yes                   | outpatient |
| 115                                           | m | 17 | Workout   | Contusion toe I + II                        | Barbell fell on toes  | outpatient |
| 116                                           | m | 23 | Workout   | Shoulder luxation                           | Barbell fell down     | outpatient |
| 117                                           | m | 29 | Workout   | Cervical myogelosis                         | yes                   | outpatient |
| 118                                           | m | 31 | Workout   | Cervical syndrome                           | yes                   | outpatient |
| 119                                           | m | 31 | Workout   | Trauma of thumb                             | yes                   | outpatient |
| <b>Soft Tissue Injuries</b>                   |   |    |           |                                             |                       |            |
| 120                                           | m | 19 | Workout   | Laceration cheek                            | Barbell fell on cheek | outpatient |
| 121                                           | m | 24 | Workout   | Laceration eye                              | Barbell fell on eye   | outpatient |
| 122                                           | m | 17 | Workout   | Laceration tibia                            | Hit leg on a iron rod | outpatient |
| <b>Others (Infections, Rhabdomyolysis...)</b> |   |    |           |                                             |                       |            |
| 123                                           | m | 39 | Workout   | Pneumonia                                   | -                     | outpatient |
| 124                                           | f | 39 | Workout   | Urticaria                                   | -                     | outpatient |
| 125                                           | m | 45 | Workout   | Urolithiasis                                | -                     | outpatient |
| 126                                           | m | 44 | Swimming  | Nausea, vomiting                            | overexertion          | outpatient |
| 127                                           | f | 22 | Workout   | Tinnitus                                    | -                     | outpatient |

|            |   |    |         |                                                 |     |            |
|------------|---|----|---------|-------------------------------------------------|-----|------------|
| <b>128</b> | f | 30 | Workout | Exercise-induced Asthma                         | yes | outpatient |
| <b>129</b> | m | 20 | Workout | Vomiting blood                                  | -   | outpatient |
| <b>130</b> | m | 28 | Workout | Red-brown urine and high CK                     | yes | outpatient |
| <b>131</b> | m | 37 | Workout | Hyperventilation after taking anabolic steroids |     | outpatient |
| <b>132</b> | m | 29 | Workout | Unclear sore throat                             | -   | outpatient |
| <b>133</b> | m | 32 | Workout | Rhabdomyolysis                                  | -   | inpatient  |
| <b>134</b> | f | 40 | Workout | Acute hyperventilation                          | -   | outpatient |
| <b>135</b> | m | 18 | Workout | Unclear headache                                | -   | outpatient |
| <b>136</b> | m | 27 | Workout | Acute rhabdomyolysis                            | -   | outpatient |
| <b>137</b> | m | 51 | Workout | Unclear thoracic paraesthesia                   | -   | outpatient |
| <b>138</b> | m | 29 | Workout | Somatisation trouble and hyperventilation       | -   | outpatient |
