# Supplementary material for: Time for a Break: Admissions to an Urban Emergency Department after Working Out—A Retrospective Study from Switzerland
Source: Hindawi journal article supplement (doi:10.1155/2015/610137), 2015-01-01
Supplement: f1 [file 610137.f1.zip]

### Cardiovascular events (Patient groups > 30 years)

| Patient number | Problem                                                | Smoking      | Hypertension                           | Dyslipidemia | Hyper-cholesterinemia | Underlying disease or prior events                                             | Family history | Medication                                                                    |
|----------------|--------------------------------------------------------|--------------|----------------------------------------|--------------|-----------------------|--------------------------------------------------------------------------------|----------------|-------------------------------------------------------------------------------|
| 1              | Atrial Fibrillation                                    | x (30py)     | x                                      |              |                       | Stent RCA, RCX, IMA                                                            |                | Aspirin cardio 100mg ; Nebilet 5mg ; Co-Aprovel 150mg                         |
| 2              | STEMI                                                  |              | x                                      |              |                       |                                                                                |                |                                                                               |
| 3              | Syncope with arterial hypertension                     |              | x                                      |              |                       | Hyper-tension                                                                  |                | Lisopril plus 20mg; Amlodipin 10mg                                            |
| 4              | Uncontrolled hypertension with dyspnoea and leg oedema | x            |                                        |              | x                     | None                                                                           |                | Brufen 600mg                                                                  |
| 5              | Syncope                                                | 2 pipes/week | x                                      | x            | x                     | diastolic dysfunction; left atrial and ventricular dilatation with normal LVEF |                | Xenalon 50; Aspirin 100mg; Tamsulosim 0.4, Sortis 40mg; Votum 20; Dilzem 90mg |
| 6              | Arrhythmia of unknown origin                           |              | Yes, but normotone with ACE-inhibitors |              |                       |                                                                                |                | Coversum 8 mg; Neurontin 800 mg                                               |
| 7              | STEMI                                                  | x            |                                        | x            |                       |                                                                                |                |                                                                               |
| 8              | Several Pre-syncopes                                   | none         |                                        |              |                       |                                                                                |                |                                                                               |
| 10             | TdP-Tachykardia                                        |              | x                                      | x            |                       |                                                                                |                | Metozero 50 mg, Atacand; cholesterol-lowering agent                           |

| Patient number | Problem                                    | Smoking | Hypertension | Dyslipidemia | Hyper-cholesterinemia | Underlying disease or prior events                                    | Family history                       | Medication                                     |
|----------------|--------------------------------------------|---------|--------------|--------------|-----------------------|-----------------------------------------------------------------------|--------------------------------------|------------------------------------------------|
| 11             | Art. hypertension, palpitation and syncope |         | x            |              |                       | Hyper-tension                                                         | Father died at the age of 48 of a MI | Lisitril; Amlodipin 5mg                        |
| 12             | Tachycardia and dyspnoea                   |         |              |              |                       |                                                                       |                                      | Viagra 1/week                                  |
| 13             | Syncope                                    | none    |              |              |                       | Coronary cardiopathy Stent                                            |                                      | Aspirin cardio 100mg; Sortis 20mg              |
| 14             | Carotic dissection                         | none    |              |              |                       | Stenosis A. carotis interna                                           |                                      | Aspirin cardio 100 mg                          |
| 15             | STEMI                                      |         | x            | x            |                       | s/p Coronary artery bypass graft surgery; CVI                         |                                      |                                                |
| 17             | Narrow Complex Tachykardie                 | none    |              |              |                       |                                                                       |                                      | Oestrogel Testosteron-derivative (since years) |
| 19             | Atrial tachycardia                         | none    |              |              |                       | s/p transposition of the great vessels with ventricular septal defect |                                      | Aspirin cardio 100mg; Lisitril 20mg            |

## Neurological events

| Patient number | Problem           | Smoking  | Hypertension            | Dyslipidemia | Hyper-cholesterinaemia | Underlying disease or prior events                                          | Family history                 | Medication                                                       |
|----------------|-------------------|----------|-------------------------|--------------|------------------------|-----------------------------------------------------------------------------|--------------------------------|------------------------------------------------------------------|
| 30             | Epileptic seizure | none     |                         |              |                        | pilocytic astrocytoma grade 1                                               |                                | Ditropan; Magnesium; after seizure new: Keppra 500mg             |
| 31             | Epileptic seizure | none     |                         |              |                        | epileptic seizures                                                          |                                | Tripeltherapy with Keppra, Depakine and Phenobarbital            |
| 35             | Epileptic seizure | x (80py) | x                       | x            |                        | epileptic seizure                                                           |                                | Aspirin Cardio 100 mg; Sortis 40 mg Keppra 500 mg                |
| 36             | Epileptic seizure | x (6py)  |                         |              |                        | s/p brain abscess                                                           |                                |                                                                  |
| 42             | Epileptic seizure | none     |                         |              |                        |                                                                             |                                | none                                                             |
| 20             | Ischemic Stroke   |          | Borderline hypertension |              |                        |                                                                             |                                |                                                                  |
| 21             | Ischemic Stroke   | none     |                         |              |                        |                                                                             |                                | Aspirin Cardio 100 mg (primary prevention)                       |
| 23             | Ischemic Stroke   |          | x                       | x            |                        | recurrent TIAs and Amaurosis fugax left side; s/p CVI left A. cerebri media | Positive family history for IS | Plavix 75mg; Atacand 8mg; Sortis 10mg; Xatral uno; Amlodipin 5mg |
