# Supplementary material for: Time for a Break: Admissions to an Urban Emergency Department after Working Out—A Retrospective Study from Switzerland
Source: Biomed Res Int. 2015 Feb 4;2015:610137. doi: 10.1155/2015/610137 (PMC4334856; doi:10.1155/2015/610137)
Supplement: Supplementary file 1 — Supplement 1: Detailed information about all patients regarding sex, age, region of injury, direct trauma and outcome classified as cardiovascular or neurological incident, musculoskeletal injury, soft tissue injury and others. Supplement 2: Detailed information about risk factors, prior events and medical treatment of patients in the cardiovascualr group aged > 30 years and the neurological patients presenting with IS or epileptic seizures. [file 610137.f1.zip]

Archive with 2 entries (2 files):
- SUPPLEMENT 1.pdf
- SUPPLEMENT 2.pdf
